# Supplementary material for: Endosomal TLR3, TLR7, and TLR8 control neuronal morphology through different transcriptional programs
Source: PubMed Central journal article supplement — J Cell Biol. 2018 Aug 6;217(8):2727–42. doi: 10.1083/jcb.201712113 (PMC6080926; doi:10.1083/jcb.201712113), 2018-08-06
Supplement: JCB_201712113_sm.pdf [file JCB_201712113_sm.pdf]

## Supplemental material

Hung et al., <https://doi.org/10.1083/jcb.201712113>

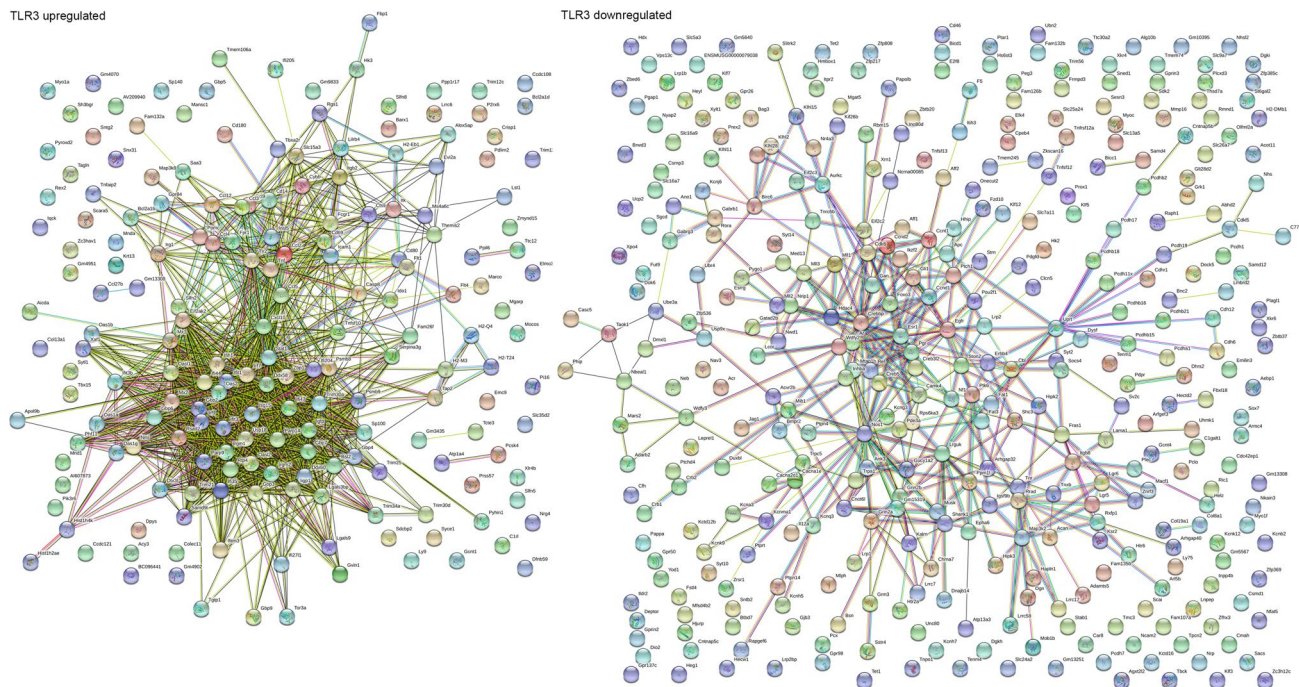

Figure S1. **Interaction map of TLR3-regulated genes.** Genes up- and down-regulated upon TLR3 activation in cultured neurons were analyzed for protein-protein interactions in STRING. TLR3-up-regulated gene products interacted considerably with each other, with innate immune responses as a core function. TLR3-down-regulated genes included function-related transcription factors, signaling molecules, and synaptic ion channels. These data strengthen the role of TLR3 activation in triggering the innate immune response of neurons and impairing their synaptic responses.

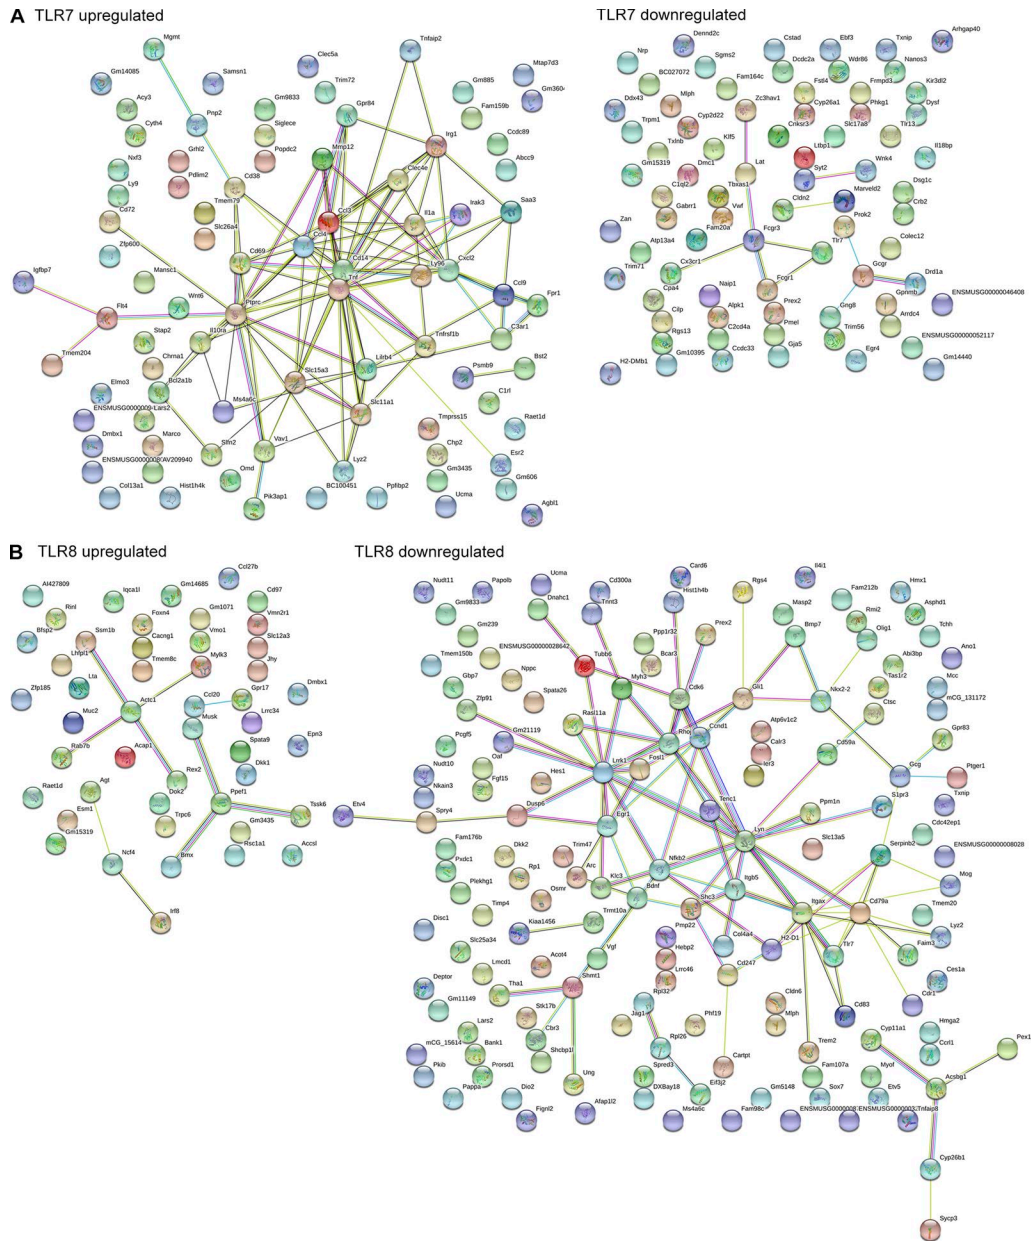

Figure S2. **Interaction maps of TLR7 and TLR8 up-regulated and down-regulated genes.** (A and B) TLR7-regulated genes (A) and TLR8-regulated genes (B) in cultured neurons were analyzed for protein–protein interactions in STRING. (A) For TLR7-up-regulated genes, the major protein interactions were related to innate immune responses. There were very few protein interactions among TLR7-down-regulated genes. (B) TLR8-up-regulated gene products exhibited very few interactions, whereas TLR8-down-regulated genes presented strong interactions related to several signaling pathways and immediate early genes.

Table S1. **List of genes coregulated by TLR3, TLR7, and TLR8**

| <b>TLR</b>           | <b>Gene list</b>                                                                                                                                                                                                                                                                                                                                                                                                                                                                                                                           |
|----------------------|--------------------------------------------------------------------------------------------------------------------------------------------------------------------------------------------------------------------------------------------------------------------------------------------------------------------------------------------------------------------------------------------------------------------------------------------------------------------------------------------------------------------------------------------|
| Up-regulated         |                                                                                                                                                                                                                                                                                                                                                                                                                                                                                                                                            |
| TLR3, TLR7, and TLR8 | <i>Gm5643_1</i> and <i>Gm3435</i>                                                                                                                                                                                                                                                                                                                                                                                                                                                                                                          |
| TLR3 and TLR7        | <i>Irg1</i> , <i>Tnf</i> , <i>Sifn2</i> , <i>Cd69</i> , <i>Gpr84</i> , <i>Gm5512_1</i> , <i>Ccl4</i> , <i>Ccl3</i> , <i>Marco</i> , <i>Fpr1</i> , <i>Flt4</i> , <i>Cd14</i> , <i>Bcl2a1b</i> , <i>Bst2</i> , <i>Ccl9</i> , <i>Hist1h4k</i> , <i>Ly9</i> , <i>Psmb9</i> , <i>C1rl</i> , <i>Ms4a6c</i> , <i>Lilrb4</i> , <i>Elmo3</i> , <i>Saa3</i> , <i>2210408F21Rik</i> , <i>Slc15a3</i> , <i>1700028P14Rik</i> , <i>Col13a1</i> , <i>Tnfaip2</i> , <i>Gm9833</i> , <i>Pdlim2</i> , <i>LOC100504703</i> , <i>Acy3</i> , and <i>Mansc1</i> |
| TLR3 and TLR8        | <i>Rex2</i> and <i>Ccl27b</i>                                                                                                                                                                                                                                                                                                                                                                                                                                                                                                              |
| TLR7 and TLR8        | <i>Dmbx1</i>                                                                                                                                                                                                                                                                                                                                                                                                                                                                                                                               |
| Down-regulated       |                                                                                                                                                                                                                                                                                                                                                                                                                                                                                                                                            |
| TLR3, TLR7, and TLR8 | <i>Mlph</i> and <i>Prex2</i>                                                                                                                                                                                                                                                                                                                                                                                                                                                                                                               |
| TLR3 and TLR7        | <i>H2-DMb1</i> , <i>Arhgap40</i> , <i>Tmem254c</i> , <i>Nrp</i> , <i>Gm15319</i> , <i>Dysf</i> , <i>Frmpd3</i> , <i>Syt2</i> , <i>Trim56</i> , <i>Crb2</i> , <i>Klf5</i> , and <i>Fstl4</i>                                                                                                                                                                                                                                                                                                                                                |
| TLR3 and TLR8        | <i>Gli1</i> , <i>Gm15612</i> , <i>Cdk6</i> , <i>Papalb</i> , <i>Ano1</i> , <i>Pappa</i> , <i>Slc13a5</i> , <i>Jag1</i> , <i>Sox7</i> , <i>Fam107a</i> , <i>Dio2</i> , <i>Deptor</i> , <i>Cdc42ep1</i> , <i>Shc3</i> , <i>Nkain3</i> , and <i>Ccnd1</i>                                                                                                                                                                                                                                                                                     |
| TLR7 and TLR8        | <i>Tlr7</i> , <i>4930506C21Rik</i> , and <i>Txnip</i>                                                                                                                                                                                                                                                                                                                                                                                                                                                                                      |

Table S2. Gene lists for the top five biological processes regulated by TLR activation in cultured neurons

| GO biological process                                                   | Gene list                                                                                                                                                                                                                                                                                                                                                                                                  |
|-------------------------------------------------------------------------|------------------------------------------------------------------------------------------------------------------------------------------------------------------------------------------------------------------------------------------------------------------------------------------------------------------------------------------------------------------------------------------------------------|
| <b>TLR3-up-regulated</b>                                                |                                                                                                                                                                                                                                                                                                                                                                                                            |
| <b>Innate immune response</b>                                           | <i>Cd14, Cybb, Fcgr1, Gbp2, H2-Eb1, H2-M3, Irgm1, Ifit1, Ifit3, Acod1, Itk, Lgals9, Cd180, Ly9, Marco, Gbp4, Mx1, Mx2, Eif2ak2, Trim30a, Ccl12, Ccl2, Ccl3, Ccl4, Ccl5, Ccl9, Trim21, Stat1, Tap2, Tgtp1, Tnf, Oasl2, Tlr2, Irf7, Irgm2, Gbp3, Rsad2, Zbp1, Iigp1, Nmi, Ifitm3, Bst2, Ifih1, Zc3hav1, Parp9, Gbp6, Pik3r6, Trim25, Gbp5, Gbp7, Ddx58, Oasl1, C1rl, Ddx60, Gbp9, Oas2, Nlrc5, and Isg15</i> |
| <b>Response to cytokine</b>                                             | <i>Casp8, Cd14, Gbp2, H2-Eb1, Irgm1, Cxcl10, Ifi204, Ifi47, Ifit1, Ifit3, Igtg, Acod1, Gbp4, Mx2, Eif2ak2, Saa3, Ccl12, Ccl2, Ccl3, Ccl4, Ccl5, Ccl9, Serpina3g, Trim21, Stat1, Tgtp1, Tnf, Irf7, Irgm2, Gbp3, Zbp1, Iigp1, Nmi, Ifitm3, Bst2, Parp9, Gbp6, Ifi205, Gbp5, Gbp7, Ifi209, Gbp9, Gm4951, Xaf1, Nlrc5, and Isg15</i>                                                                           |
| <b>Regulation of defense response</b>                                   | <i>Alox5ap, Cd14, Ctss, Fcgr1, H2-M3, Ido1, Acod1, Lgals9, Cd180, Gbp4, Trim30a, Ccl3, Ccl5, Tap2, Tnf, Tlr2, Irf7, Rsad2, Zbp1, Nmi, Fam132a, Ifih1, Zc3hav1, Parp9, Pik3r6, Gbp5, Ddx58, Ddx60, Nlrc5, Cybb, Flt4, Irf9, Itk, Ly9, Pomc, Eif2ak2, Ccl2, Ccl4, Isg15, Bcl2a1d, Fpr1, Themis2, C1rl, and Trim21</i>                                                                                        |
| <b>Inflammatory response</b>                                            | <i>Alox5ap, Cd14, Ctss, Cybb, Fcgr1, Fpr1, Icam1, Ido1, Cxcl10, Acod1, Itgb2, Lgals9, Cd180, Saa3, Ccl12, Ccl2, Ccl3, Ccl4, Ccl5, Ccl9, Tbx2r, Tnf, Tlr2, Fam132a, Gbp5, Themis2, Zc3hav1, Ddx60, Gbp4, Scara5, and Ddx58</i>                                                                                                                                                                              |
| <b>Response to molecule of bacterial origin</b>                         | <i>Aicda, Cd14, Cd80, Gbp2, H2-M3, Ido1, Cxcl10, Acod1, Lgals9, Cd180, Eif2ak2, Ccl12, Ccl2, Ccl5, Stat1, Tap2, Tbx2r, Tnf, Tlr2, Gbp6, Fcgr1, Irgm2, Gbp3, Iigp1, Gbp7, Gbp9, Isg15, and Mgarp</i>                                                                                                                                                                                                        |
| <b>TLR3-down-regulated</b>                                              |                                                                                                                                                                                                                                                                                                                                                                                                            |
| <b>Chemical synaptic transmission</b>                                   | <i>Chrna7, Camk4, Egfr, Erbb4, Grin2a, Grin2b, Htr2a, Htr6, Kcnma1, Nf1, Nos1, Musk, Shc3, Sstr4, Syt2, Tnr, Pclo, Syt10, Sv2c, Slc24a2, Pcdhb2, Pcdhb15, Pcdhb16, Pcdhb18, Pcdhb21, Grm3, Ston2, Kmt2a, Pcdh17, Igsf9b, Shank1, Dgki, Kalrn, Cacna1e, Ccnd2, Aff2, Ar, Hipk2, Nr4a3, Prex2, Zfhx3, Pgr, Gcnt4, and Strn</i>                                                                               |
| <b>Sensory organ development</b>                                        | <i>Acvr2b, Apc, Bmpr2, Col8a1, Egfr, Fat1, Lgr5, Grin2b, Hipk2, Inhba, Jag1, Kcnma1, Lama1, Nf1, Nr4a3, Nrp1, Pou2f1, Prox1, Grk1, Adgrv1, Crb1, Nhs, Kmt2c, Sdk2, Bnc2, Fat3, and Alg10b</i>                                                                                                                                                                                                              |
| <b>Homophilic cell adhesion via plasma membrane adhesion molecules</b>  | <i>Cdh6, Pcdha7, Ptptr, Pcdh1, Pcdhb18, Cdhr1, Cdh12, Igsf9b, Sdk2, Fat3, Pcdh19, and Pcdhb16</i>                                                                                                                                                                                                                                                                                                          |
| <b>Response to organic cyclic compound</b>                              | <i>Acr, Chrna7, Ar, Cdk6, Egfr, Esr1, Gabrb1, Htr2a, Inhba, Itpr2, Kcnma1, Nr4a3, Nos1, Pappa, Pgr, Ptch1, Rora, Sstr4, Ube3a, Esrrg, Abhd2, Pde3a, Heyl, Ago3, Ago2, Nrip1, Trpa1, Med13, Kmt2d, Kalrn, Il12a, Ptk6, Ccnd1, Erbb4, Zfp536, Sesn3, Phip, Rps6ka3, Rxfp1, Bmpr2, and Apc</i>                                                                                                                |
| <b>Synapse organization</b>                                             | <i>Chrna7, Ank3, Bsn, Erbb4, Musk, Tnr, Pclo, Pcdhb2, Pcdhb15, Pcdhb16, Pcdhb18, Pcdhb21, Pcdh17, Sdk2, Shank1, Slitrk2, and Kalrn</i>                                                                                                                                                                                                                                                                     |
| <b>TLR7-up-regulated</b>                                                |                                                                                                                                                                                                                                                                                                                                                                                                            |
| <b>Innate immune response</b>                                           | <i>Cd14, Acod1, Ly9, Ly96, Marco, Slc11a1, Ccl3, Ccl4, Ccl9, Tnf, Vav1, Clec5a, Raet1d, Clec4e, Bst2, Irak3, Pik3ap1, and C1rl</i>                                                                                                                                                                                                                                                                         |
| <b>Inflammatory response</b>                                            | <i>C3ar1, Cd14, Fpr1, Il1a, Acod1, Ly96, Slc11a1, Saa3, Ccl3, Ccl4, Ccl9, Cxcl2, Tnf, Tnfrsf1b, Siglece, Pik3ap1, Cd38, Ptprc, Vav1, Clec4e, Samsn1, Irak3, C1rl, Lyz2, and Esr2</i>                                                                                                                                                                                                                       |
| <b>Cellular response to IL-1</b>                                        | <i>Il1a, Acod1, Saa3, Ccl3, Ccl4, Ccl9, Irak3, C3ar1, Cxcl2, Vav1, Cd14, Slc11a1, Ptprc, Tnf, Bst2, Fpr1, Esr2, Flt4, Pik3ap1, and Chp2</i>                                                                                                                                                                                                                                                                |
| <b>Immune effector process</b>                                          | <i>Ly9, Slc11a1, Ptprc, Abcc9, Tnf, Vav1, Raet1d, Clec4e, Bst2, Irak3, C1rl, Milr1, C3ar1, Samsn1, and Psmb9</i>                                                                                                                                                                                                                                                                                           |
| <b>Positive regulation of humoral immune response</b>                   | <i>Acod1, Ptprc, Tnf, Abcc9, Bst2, Irak3, Slc11a1, Samsn1, Ccl4, Lyz2, Clec4e, Vav1, Ly96, Il1a, and Tnfrsf1b</i>                                                                                                                                                                                                                                                                                          |
| <b>TLR7-down-regulated</b>                                              |                                                                                                                                                                                                                                                                                                                                                                                                            |
| <b>Antigen processing and presentation of exogenous peptide antigen</b> | <i>Fcgr1, Fcgr3, H2-DMb1, Nrp1, Zan, Colec12, Lat, and Zc3hav1</i>                                                                                                                                                                                                                                                                                                                                         |
| <b>Positive regulation of defense response</b>                          | <i>Fcgr1, Fcgr3, Zc3hav1, Colec12, Tlr7, Tlr13, Trim56, and Cx3cr1</i>                                                                                                                                                                                                                                                                                                                                     |
| <b>Telencephalon cell migration</b>                                     | <i>Cx3cr1, Drd1, and Nrp1</i>                                                                                                                                                                                                                                                                                                                                                                              |
| <b>Coronary vasculature development</b>                                 | <i>Nrp1, Prok2, Ltbp1, Gja5, Klfs, Cx3cr1, and Crb2</i>                                                                                                                                                                                                                                                                                                                                                    |
| <b>Regulation of vasoconstriction</b>                                   | <i>Drd1, Gja5, Tbxas1, Trpm1, Wnk4, Fam20a, and Atp13a4</i>                                                                                                                                                                                                                                                                                                                                                |
| <b>TLR8-up-regulated<sup>a</sup></b>                                    |                                                                                                                                                                                                                                                                                                                                                                                                            |
| <b>Positive regulation of cytokine production</b>                       | <i>Agt, Irf8, Lta, Raet1b, Ccl20, Rab7b, and Gpr17</i>                                                                                                                                                                                                                                                                                                                                                     |
| <b>Cardiac muscle cell differentiation</b>                              | <i>Actc1, Agt, Dkk1, Mylk3, and Tmem8c</i>                                                                                                                                                                                                                                                                                                                                                                 |

Table S2. Gene lists for the top five biological processes regulated by TLR activation in cultured neurons (Continued)

| GO biological process                                | Gene list                                                                                                                                                                                       |
|------------------------------------------------------|-------------------------------------------------------------------------------------------------------------------------------------------------------------------------------------------------|
| Positive regulation of cellular component biogenesis | <i>Agt, Irf8, Musk, Adgre5, Mylk3, Dkk1, Lta, and Trpc6</i>                                                                                                                                     |
| Inflammatory response                                | <i>Agt, Lta, Ccl20, Mylk3, and Gpr17</i>                                                                                                                                                        |
| TLR8-down-regulated                                  |                                                                                                                                                                                                 |
| Negative regulation of MAPK activity                 | <i>Bmp7, Lyn, Spry4, Dusp6, Spred3, Cd300a, Pkib, Deptor, Prex2, Ier3, Lrrk1, Ccnd1, Gcg, Cartpt, Serpinb2, Fcmlr, Timp4, Hmga2, Bank1, Fgf15, and Trem2</i>                                    |
| Regulation of Wnt signaling pathway                  | <i>Ccnd1, Egr1, Gli1, Hmga2, Sox7, Dkk2, Atp6v1c2, Lrrk1, Disc1, Mcc, and Bdnf</i>                                                                                                              |
| Glomerulus development                               | <i>Bmp7, Col4a4, Egr1, Hes1, Jag1, Bdnf, Ccnd1, Cdk6, S1pr3, Hmga2, Lyn, Nkx2-2, Nppc, Pmp22, Cartpt, Ucma, Hist1h4b, Timp4, Fgf15, Etv4, Phf19, Tns2, Gli1, Txnip, Cyp26b1, Rp1, and Bcar3</i> |
| Regulation of osteoblast differentiation             | <i>Bmp7, Cdk6, Gli1, Jag1, Nppc, and Ucma</i>                                                                                                                                                   |
| Negative regulation of cell proliferation            | <i>Bdnf, Bmp7, Cdk6, Fosl1, Hes1, Lyn, Nppc, Etv4, Pmp22, Sox7, Tns2, Cd300a, and Mcc</i>                                                                                                       |

<sup>a</sup>For TLR8-up-regulated group, only four GO processes were significant.

Table S3. Primer sequences and probe numbers of the Universal Probe Library for Q-PCR

| Gene           | Quantitative RT-PCR primer pair |                          | Probe # |
|----------------|---------------------------------|--------------------------|---------|
|                | Forward (5'-3')                 | Reverse (5'-3')          |         |
| <i>Tlr8</i>    | CAAACGTTTTACCTTCCTTTGTCT        | ATGGAAGATGGCACTGGTTC     | 56      |
| <i>Tlr7</i>    | TGATCCTGGCCTATCTCTGAC           | CGTGTCCACATCGAAAAAC      | 25      |
| <i>Arc</i>     | GGTGAAGCTGAAGCCACAAAT           | TTCACCTGGTATGAATCACTGCTG | 79      |
| <i>Egr1</i>    | GTCAGCAGCTTCCCCTCT              | TGAAAGACCAGTTGAGGTGCT    | 17      |
| <i>Egr4</i>    | GACCGCTTCTCTCCAAG               | AGCCCAGCTCAAGAAGTCG      | 27      |
| <i>c-Fos</i>   | GGGACAGCCTTTCCTACTACC           | AGATCTGCGCAAAGTCCTG      | 67      |
| <i>Il6</i>     | GCTACCAAACCTGGATATAATCAGGA      | CCAGGTAGCTATGGTACTCCAGAA | 6       |
| <i>Il1b</i>    | AGTTGACGGACCCCAAAAG             | AGCTGGATGCTCTCATCAGG     | 38      |
| <i>Tnfa</i>    | TTGTCTTAATAACGCTGATTTGGT        | GGGAGCAGAGGTTCACTGAT     | 64      |
| <i>Il12b</i>   | GACTCCAGGGGACAGGCTA             | CCAGGAGATGGTTAGCTTCTGA   | 27      |
| <i>Il10</i>    | CAGAGCCACATGCTCCTAGA            | TGTCCAGCTGGTCTTTGTT      | 41      |
| <i>CCL3</i>    | TGCCCTTGCTGTTCTTCTCT            | GTGGAATCTTCCGGCTGTAG     | 40      |
| <i>CCL4</i>    | GCCCTCTCTCCTCTTGCT              | GGAGGGTCAGAGCCATT        | 1       |
| <i>CCL5</i>    | TGCAGAGGACTCTGAGACAGC           | GAGTGGTGTCCGAGCCATA      | 110     |
| <i>Myd88</i>   | TGGCCTTGTTAGACCGTGA             | AAGTATTTCTGGCAGTCTCTCTC  | 17      |
| <i>GAPDH</i>   | AATGTGTCCGTCGTGGATCT            | CCCAGCTCTCCCATACATA      | 80      |
| <i>Gm10069</i> | TGCCCAGCAGTTAGTACCC             | TGCTTCCTGTCTCCACAGT      | 64      |
